# Supplementary material for: COVID-19 vaccines for children and adolescents in Africa: aligning our priorities to situational realities
Source: PubMed Central journal article supplement — BMJ Glob Health. 2022 Feb 12;7(2):e007839. doi: 10.1136/bmjgh-2021-007839 (PMC8844950; doi:10.1136/bmjgh-2021-007839), 2022-02-12
Supplement: bmjgh-2021-007839supp001.pdf [file bmjgh-2021-007839supp001.pdf]

COVID-19 VACCINES FOR CHILDREN IN AFRICA

1

**SUPPLEMENTAL FILE**

COVID-19 Vaccines for Children and Adolescents in Africa: Aligning our Priorities to  
Situational Realities

## COVID-19 VACCINES FOR CHILDREN IN AFRICA

2

## References

1. World Health Organization. Primary health care on the road to universal health coverage 2019: Monitoring report. 2019. Available: <https://www.who.int/docs/default-source/documents/2019-uhc-report.pdf> (accessed Dec 12, 2021).
2. Pettersson N, Manley B, Hernandez S. Tracking Covid-19's global spread. 2021. Available: <https://edition.cnn.com/interactive/2020/health/coronavirus-maps-and-cases/> (accessed Dec 12, 2021).
3. Johns Hopkins Coronavirus Resource Centre. Mortality analyses. 2021. Available: <https://coronavirus.jhu.edu/data/mortality> (accessed Dec 12, 2021).
4. European Centre for Disease Prevention and Control. Overview of the implementation of COVID-19 vaccination strategies and vaccine deployment plans in the EU/EEA – 1 February 2021. 2021. Available: <https://www.ecdc.europa.eu/sites/default/files/documents/Overview-of-COVID-19-vaccination-strategies-deployment-plans-in-the-EU-EEA.pdf> (accessed Dec 12, 2021).
5. Yilmaz M. Children 5-11 can get coronavirus vaccine in Slovakia starting Thursday. 2021. Available: <https://www.aa.com.tr/en/latest-on-coronavirus-outbreak/children-5-11-can-get-coronavirus-vaccine-in-slovakia-starting-thursday/2359521> (accessed Dec 12, 2021).
6. Government of the Republic of Slovenia. Green light to start vaccinating children from the age of 12. 2021. Available: <https://www.gov.si/en/news/2021-05-31-green-light-to-start-vaccinating-children-from-the-age-of-12/> (accessed Dec 12, 2021).

## COVID-19 VACCINES FOR CHILDREN IN AFRICA

3

7. Lehman M. SMHS juniors want to help senior citizens get vaccines. 2021. Available: <https://sanmarinotribune.com/smhs-juniors-want-to-help-senior-citizens-get-vaccines/> (accessed Dec 12, 2021).
8. Montalti M, Soldà G, Di Valerio Z, et al. Early results on safety of Sputnik V vaccine (Gam-COVID-Vac) in the Republic of San Marino using active surveillance. *EClinicalMedicine*. 2021; 38:101027. <https://doi.org/10.1016/j.eclinm.2021.101027>
9. Deccan Herald. Which countries are vaccinating children against Covid-19? 2021. Available: <https://www.deccanherald.com/international/which-countries-are-vaccinating-children-against-covid-19-993328.html> (accessed Dec 12, 2021).
10. Walker L. 12 to 15 year-olds can get vaccinated with parental consent. 2021. Available: <https://www.brusselstimes.com/news/belgium-all-news/179094/several-families-to-challenge-vaccination-of-16-and-17-year-olds-in-court> (accessed Dec 12, 2021).
11. United Kingdom Department of Health and Social Care. Joint Committee on Vaccination and Immunisation: Advice on priority groups for COVID-19 vaccination. 2021. Available: [https://assets.publishing.service.gov.uk/government/uploads/system/uploads/attachment\\_data/file/948353/Priority\\_groups\\_for\\_coronavirus\\_COVID-19\\_vaccination\\_-\\_advice\\_from\\_the\\_JCVI\\_2\\_December\\_2020.pdf](https://assets.publishing.service.gov.uk/government/uploads/system/uploads/attachment_data/file/948353/Priority_groups_for_coronavirus_COVID-19_vaccination_-_advice_from_the_JCVI_2_December_2020.pdf) (accessed Dec 12, 2021).
12. United Kingdom Medicines and Healthcare products Regulatory Agency. UK medicines regulator gives approval for first UK COVID-19 vaccine. 2021. Available: <https://www.gov.uk/government/news/uk-medicines-regulator-gives-approval-for-first-uk-covid-19-vaccine> (accessed Dec 12, 2021).
13. United Kingdom Department of Health and Social Care. All young people aged 16 and 17 in England to be offered vaccine by next week. 2021. Available:

## COVID-19 VACCINES FOR CHILDREN IN AFRICA

4

- <https://www.gov.uk/government/news/all-young-people-aged-16-and-17-in-england-to-be-offered-vaccine-by-next-week> (accessed Dec 12, 2021).
14. United Kingdom Department of Health and Social Care. Young people aged 12 to 15 to be offered a COVID-19 vaccine. 2021. Available: <https://www.gov.uk/government/news/young-people-aged-12-to-15-to-be-offered-a-covid-19-vaccine> (accessed Dec 12, 2021).
15. Australian Government Department of Health. COVID-19 vaccination – Children aged 12 and over can get the vaccine. 2021. Available: <https://www.health.gov.au/sites/default/files/documents/2021/10/covid-19-vaccination-children-aged-12-and-over-can-get-the-covid-19-vaccine-children-aged-12-and-over-can-get-the-covid-19-vaccine.pdf> (accessed Dec 12, 2021).
16. Centers for Disease Control and Prevention. How CDC is making COVID-19 vaccine recommendations. 2021. Available: <https://www.cdc.gov/coronavirus/2019-ncov/vaccines/recommendations-process.html> (accessed Dec 12, 2021).
17. Centers for Disease Control and Prevention. CDC recommends pediatric COVID-19 vaccine for children 5 to 11 years. 2021. Available: <https://www.cdc.gov/media/releases/2021/s1102-PediatricCOVID-19Vaccine.html> (accessed Dec 12, 2021).
18. Xinhua News Agency. Hungary starts vaccination of teenagers, plans new easing measures. 2021. Available: [http://www.xinhuanet.com/english/europe/2021-05/14/c\\_139944004.htm](http://www.xinhuanet.com/english/europe/2021-05/14/c_139944004.htm) (accessed Dec 12, 2021).
19. Xinhua News Agency. Hungary to allow COVID-19 vaccination of 12- to 16-year-olds. 2021. Available: [http://www.xinhuanet.com/english/europe/2021-06/11/c\\_1310001374.htm](http://www.xinhuanet.com/english/europe/2021-06/11/c_1310001374.htm) (accessed Dec 12, 2021).

## COVID-19 VACCINES FOR CHILDREN IN AFRICA

5

20. Notes from Poland. Poland opens Covid vaccine registration to 16- and 17-year-olds. 2021. Available: <https://notesfrompoland.com/2021/05/14/poland-opens-covid-vaccine-registration-to-16-and-17-year-olds/> (accessed Dec 12, 2021).
21. Piasecka M. COVID-19 vaccination in Poland. 2021. Available: <http://kidsinthecity.pl/covid-vaccine-in-poland/> (accessed Dec 12, 2021).
22. Szymański L. Poland to begin vaccinating children against Covid-19 on Dec. 16. 2021. Available: <https://www.thefirstnews.com/article/poland-to-begin-vaccinating-children-against-covid-19-on-dec-16-26511> (accessed Dec 12, 2021).
23. The Agenzia Nazionale Stampa Associata. Italy opens COVID-19 vaccinations to all aged 16 and over. 2021. Available: [https://www.ansa.it/english/news/general\\_news/2021/06/03/italy-opens-covid-19-vaccinations-to-all-age-groups\\_9df49dba-e5d7-48af-956b-23b0181c2c0b.html](https://www.ansa.it/english/news/general_news/2021/06/03/italy-opens-covid-19-vaccinations-to-all-age-groups_9df49dba-e5d7-48af-956b-23b0181c2c0b.html) (accessed Dec 12, 2021).
24. Smith I. COVID vaccines: Which countries are vaccinating children over 12 and how do they compare? 2021. Available: <https://www.euronews.com/next/2021/09/14/covid-vaccine-for-children-who-in-europe-is-leading-the-race> (accessed Dec 12, 2021).
25. Reuters. Factbox: Countries vaccinating children against COVID-19. 2021. Available: <https://www.reuters.com/business/healthcare-pharmaceuticals/countries-vaccinating-children-against-covid-19-2021-06-29/> (accessed Dec 12, 2021).
26. Africanews. Seychelles begins COVID immunisation campaign. 2021. Available: <https://www.africanews.com/2021/01/10/seychelles-begins-covid-immunisation-campaign/> (accessed Dec 12, 2021).
27. Joubert-Lawen R, Bonnelame, B. Pfizer vaccines arrive in Seychelles to help nation's youth protect against COVID-19. 2021. Available:

## COVID-19 VACCINES FOR CHILDREN IN AFRICA

6

- <http://www.seychellesnewsagency.com/articles/15450/Pfizer+vaccines+arrive+in+Seychelles+to+help+nation%27s+youth+protect+against+COVID-> (accessed Dec 12, 2021).
28. Xinhua News Agency. Botswana prioritizes the elderly above 75 for vaccination. 2021. Available: [http://www.xinhuanet.com/english/africa/2021-04/08/c\\_139867250.htm](http://www.xinhuanet.com/english/africa/2021-04/08/c_139867250.htm) (accessed Dec 12, 2021).
29. China Global Television Network. Botswana set to receive over 38,000 doses of COVID-19 vaccine. 2021. Available: <https://newsaf.cgtn.com/news/2021-08-06/Botswana-set-to-receive-over-38-000-doses-of-COVID-19-vaccine-12umb16y5sQ/index.html> (accessed Dec 12, 2021).
30. Statista. Daily number of COVID-19 vaccination doses administered in Botswana 2021. 2021. Available: <https://www.statista.com/statistics/1231389/daily-number-of-covid-19-vaccination-doses-in-botswana/> (accessed Dec 12, 2021).
31. Africanews. Tunisia begins Covid vaccination with health care workers. 2021. Available: <https://www.africanews.com/2021/03/13/tunisia-begins-covid-vaccination-with-health-care-workers/> (accessed Dec 12, 2021).
32. AllAfrica. Tunisia: Covid-19 - Vaccination campaign for students aged 15 years and above in schools from October 7 to 14. 2021. Available: <https://allafrica.com/stories/202110060231.html> (accessed Dec 12, 2021).
33. Africanews. Libya kickstarts coronavirus vaccine drive. 2021. Available: <https://www.africanews.com/2021/04/18/libya-kickstarts-coronavirus-vaccine-drive/> (accessed Dec 12, 2021).
34. National Institute for Communicable Diseases. COVID-19 vaccine rollout strategy. 2021. Available: <https://www.nicd.ac.za/covid-19-vaccine-rollout-strategy-faq/> (accessed Dec 12, 2021).

## COVID-19 VACCINES FOR CHILDREN IN AFRICA

7

35. Mwai P. Coronavirus: South Africa rolls out vaccination programme. 2021.  
Available: <https://www.bbc.com/news/world-africa-55675806> (accessed Dec 12, 2021).
36. McCain N. Covid-19: Children aged 12 to 17 eligible for vaccine jabs from Wednesday, won't need parental consent. 2021. Available:  
<https://www.news24.com/news24/southafrica/news/covid-19-children-aged-12-to-17-eligible-for-vaccine-jabs-from-wednesday-wont-need-parental-consent-20211015>  
(accessed Dec 12, 2021).
37. World Health Organization. Eswatini launches nationwide COVID-19 vaccination campaign. 2021. Available: <https://www.afro.who.int/news/eswatini-launches-nationwide-covid-19-vaccination-campaign> (accessed Dec 12, 2021).
38. World Health Organization. Lesotho newsletter April-May 2021. 2021. Available:  
<https://www.afro.who.int/sites/default/files/2021-06/WHO%20LESOTHO%20NEWSLETTER%20APRIL%20-%20MAY%202021.pdf> (accessed Dec 12, 2021).
39. Moyo J. Zimbabwe begins COVID-19 vaccination with Chinese jabs. 2021.  
Available: <https://www.aa.com.tr/en/africa/zimbabwe-begins-covid-19-vaccination-with-chinese-jabs/2149125> (accessed Dec 12, 2021).
40. Mutsaka F. Zimbabwe opens COVID-19 vaccines to those aged 14 and older. 2021.  
Available: <https://apnews.com/article/lifestyle-africa-health-zimbabwe-coronavirus-pandemic-3e0b007ccccf08ae285710250daa84be> (accessed Dec 12, 2021).
41. Yildiz H. Egypt starts COVID-19 vaccination. 2021. Available:  
<https://www.aa.com.tr/en/middle-east/egypt-starts-covid-19-vaccination/2121613>  
(accessed Dec 12, 2021).

## COVID-19 VACCINES FOR CHILDREN IN AFRICA

8

42. Egyptian Streets. Egyptian aged 40 or older? You can register for COVID-19 vaccination this month. 2021. Available: <https://egyptianstreets.com/2021/02/24/egyptian-aged-40-or-older-you-can-register-for-covid-19-vaccination-this-month/> (accessed Dec 12, 2021).
43. Egypt Today. Egypt to vaccinate children aged between 15, 18 against COVID-19. 2021. Available: <https://www.egypttoday.com/Article/1/109479/Egypt-to-vaccinate-children-aged-between-15-18-against-COVID> (accessed Dec 12, 2021).
44. Reuters. Egypt authorizes Pfizer's COVID-19 vaccine for 12 to 15 year-olds. 2021. Available: <https://www.reuters.com/world/africa/egypt-authorizes-pfizers-covid-19-vaccine-12-15-year-olds-2021-11-28/> (accessed Dec 12, 2021).
45. World Health Organization. Nigerian health workers take country's first COVID-19 vaccine. 2021. Available: <https://www.afro.who.int/news/nigerian-health-workers-take-countrys-first-covid-19-vaccine> (accessed Dec 12, 2021).
46. Kola O. Nigeria begins COVID-19 vaccination drive. 2021. Available: <https://www.aa.com.tr/en/africa/nigeria-begins-covid-19-vaccination-drive/2166231> (accessed Dec 12, 2021).
47. Mathieu E, Ritchie H, Ortiz-Ospina E, et al. A global database of COVID-19 vaccinations. *Nat Hum Behav.* 2021; 10:1-7. <https://doi.org/10.1038/s41562-021-01122-8>
48. The American Academy of Pediatrics. Children and COVID-19 vaccination trends. 2021. Available: <https://www.aap.org/en/pages/2019-novel-coronavirus-covid-19-infections/children-and-covid-19-vaccination-trends/> (accessed Dec 12, 2021).
